# Supplementary material
Source: publisher figshare collection journal article supplement (https://tandf.figshare.com/ndownloader/files/37565259)
Supplement: Supplementary file 1 [file 37565259]

# Appendices

| 1. What facilitators apply to the technology transfer experience in your current grant? (Please rank on a scale from 1-6. 1 being not important, 6 being very important)    1. Streamlining and improving efficiency    2. Interdisciplinary collaboration    3. Working with an experienced tech transfer office    4. University supports technology transfer 2. What facilitators apply to the technology transfer experience in your current grant? (Please rank on a scale from 1-6. 1 being not important, 6 being very important)    1. Access to funding    2. Access to technical assistance    3. Access to nearby technology companies who support prototyping development.    4. Access to technology incubators    5. Other (comment field included) 3. What barriers apply to your technology transfer experience? (Please rank on a scale from 1-6. 1 being not important, 6 being very important)    1. Poorly defined and fragmented markets    2. Lack of clear regulations    3. Lack of funding to translate technology out of universities.    4. Lack of support from tech transfer office    5. Other (comment field included) 4. What barriers apply to your technology transfer experience? (Please rank on a scale from 1-6. 1 being not important, 6 being very important)    1. Lack of understanding or clear process to transfer technology.    2. Lack of adequate training to learn about technology transfers.    3. Other (comment field included) 5. Based on your experience, which of the following factors play a role in whether a technology is transferred?   (Please answer Yes or No for each answer- a,b,c and d)  If you have an RERC/DRRP/FIP   - 1. Incentives provided by the university.   2. Experience of the technology transfer office   3. Access to funding   4. Regional support for technology development and transfer     If you have an SBIR/STTR   1. Incentives provided by other entities. 2. Personal connection with someone who has successfully transferred technology. 3. Access to funding 4. Access to additional support such a small business development center 5. Do you feel the following activities would be helpful to assist in technology transfer? (please rank on a scale from 1-6) (1 being not important, 6 being very important)    1. Online training to guide your tech transfer strategy.    2. Pilot grants to support tech transfer activities.    3. Pilot grants to support customer discovery. 6. Do you feel the following activities would be helpful to assist in technology transfer? (please rank on a scale from 1-6) (1 being not important, 6 being very important)    1. Support of technology transfer plan development    2. Support to identify leading researchers/companies/funding opportunities related to your technology.    3. Support with marketing your technology 7. Would you or a member of your team be willing to be interviewed about your experience with technology transfer(s)*?    1. Yes    2. No   *If you respond yes, this means your contact information will be provided to the KT center on technology transfer, and you will be contacted for a personal interview with the University of Pittsburgh.   1. We work closely with our institution’s Technology Transfer office to identify and protect intellectual property.    1. Never    2. Rarely    3. Sometimes    4. Often    5. Always 2. We are mindful of the potential commercial value of findings from R&D activity.    1. Never    2. Rarely    3. Sometimes    4. Often    5. Always 3. We are aware of the one-year time bar on patent protection following initial public disclosure.    1. Never    2. Rarely    3. Sometimes    4. Often    5. Always 4. We value obtaining future patents as much as we value generating current publications.    1. Never    2. Rarely    3. Sometimes    4. Often    5. Always   If you are willing to be contacted for a personal interview, please provide your contact information below.  Name _______________________________________________  Grant Type ___________________________________________  E-mail _______________________________________________  Phone _______________________________________________ |
| --- |

Table 2. Barriers and Facilitators Survey Questions distributed in the KTDRR CoP Survey and the Barriers & Facilitators of TT Survey.

| Background information:  Types of grants held  Most recent grant abstract  Facilitator questions:   1. (highest ranking) Why is this the most important to your experience with technology transfer? Ask about other facilitators if listed. 2. (lowest ranking) Why is this the least important to your experience with technology transfer?   Survey responses listed here to guide the conversation.  Barriers Questions:   1. (highest ranking) In what specific ways do these barriers affect your experience with technology transfer? Ask about other barriers if listed. 2. (lowest ranking) Why are these factors not a barrier to your experience with technology transfer?   Survey responses listed here to guide the conversation.  Grant Specific Questions:   1. What has your experience been gaining access to this/these factor(s)? 2. Do you have any suggestions on how to make it easier for others in a similar position to gain access to these factors?   Survey responses listed here to guide the conversation.  Activities that help with ATTT:   1. (highest ranking activities) How would these help your specific initiatives? 2. Are there other activities you would like to see offered?   Survey responses listed here to guide the conversation.  Additional Questions:   1. For RERCs    1. Would having a formal Tech Transfer Planning Template (TTPT) be helpful when preparing your TTPT? Or would you prefer to be provided more than one format type and use the one that suits your grant best? 2. Resources    1. What current resources have facilitated TT success?    2. What is the best grant mechanism that has been most supportive of TT?    3. How can NIDILRR improve TT outcomes for the grant types you have held?       1. How can our programs fit those?    4. Do you have any experience with our programs?       1. Feedback on those. If not, here is what we are doing and do you feel these would help? 3. IMPACT reports  - Screen share on zoom and show report, send link in prep for the call with example - Show alternate report to get feedback if their report is not up to par |
| --- |

Table 3. Semi-Structured Interview Outline Structure of questions asked by the interviewer during the post-survey grantee interviews conducted on Zoom.

| Name | Description |
| --- | --- |
| Funding | Any issues related to money received for the projects |
| DRRP | DRRP Specific topics |
| Extra Funding | Any extra funding help that people mention might be helpful ex. Pilot grants |
| FIP | FIP Specific topics |
| Hardware | hardware products |
| NIDILRR Protocols | Feedback related to specific NIDILRR protocols |
| Tech Transfer Plans |  |
| RERC | RERC Grant Issues |
| SBIR |  |
| Software | software products |
| Market | Any issues with customer discovering or findings users for the product |
| Commercialization | Problems getting the correct rights/status for products |
| Customer Discovery | Topics relating to finding a market for products |
| Ownership and Financial Gain | Who benefits from the project |
| Regulatory | FDA/other regulatory topics |
| Organizational | Issues with tech transfer organizationally |
| Personal | Issues with tech transfer personally |
| Support | Any issues with finding experts to help the process move forward |
| Academia vs Industry |  |
| Conflicts of Interest | Moving from product dev to research can create these |
| Champions | People who work hard to get something out individually |
| Incubators | Specific comments about incubators |
| Mentorship and Interdisciplinary Collaboration | Topics related to finding others to help with tech transfer |
| Programs | Any suggested programs that do not exist to help grantees |
| Tech Transfer Offices | Any topic related to tech transfer offices |

Table 4. Interview Codebook
